# Supplementary material
Source: MDPI journal article supplement (https://www.mdpi.com/2304-6740/7/3/37)
Supplement: s1 [file s1]

# Supplementary Materials: Electronic Communication between Dithiolato-Bridged Diiron Carbonyl and S-Bridged Redox-Active Centres

Cédric Tard <sup>1</sup>, Stacey J. Borg <sup>2</sup>, Shirley A. Fairhurst <sup>3</sup>, Christopher J. Pickett <sup>4,\*</sup> and Stephen P. Best <sup>5,\*</sup>

<sup>1</sup> LCM, CNRS, Ecole Polytechnique, Université Paris-Saclay, 91128 Palaiseau Cedex, France; [cedric.tard@polytechnique.edu](mailto:cedric.tard@polytechnique.edu)

<sup>2</sup> School of Chemistry, The University of Melbourne, Parkville, Victoria 3010, Australia; [staceyborg@gmail.com](mailto:staceyborg@gmail.com)

<sup>3</sup> School of Chemistry, University of East Anglia, Norwich NR4 7TJ; [s.fairhurst@uea.ac.uk](mailto:s.fairhurst@uea.ac.uk)

<sup>4</sup> School of Chemistry, University of East Anglia, Norwich NR4 7TJ; [c.pickett@uea.ac.uk](mailto:c.pickett@uea.ac.uk)

<sup>5</sup> School of Chemistry, The University of Melbourne, Parkville, Victoria 3010, Australia; [spbest@unimelb.edu.au](mailto:spbest@unimelb.edu.au)

\* Correspondence: [spbest@unimelb.edu.au](mailto:spbest@unimelb.edu.au); (S.P.B.), [c.pickett@uea.ac.uk](mailto:c.pickett@uea.ac.uk); (C.J.P.)

Received: date; Accepted: date; Published: date

Figure S1 Cyclic voltammogram of (— —) nitrobenzene (2 mM) and (—) CH<sub>3</sub>C(CH<sub>2</sub>S)<sub>2</sub>CH<sub>2</sub>S(C<sub>6</sub>H<sub>4</sub>-p-NO<sub>2</sub>) (12) (2 mM) (0.2 M [NBu<sub>4</sub>][BF<sub>4</sub>] in acetonitrile, 0.1 V.s<sup>-1</sup>). 2

Figure S2. Cyclic voltammograms of the primary reduction processes of nitrobenzene (2 mM, 0.2 M [NBu<sub>4</sub>][BF<sub>4</sub>] in acetonitrile, 0.1 V.s<sup>-1</sup>) in the absence and in the presence of acetic acid: 0 (—), 1 (— —), 5 (---), 15 (----) and 30 equivalents (— - - -). 2

Figure S3. Cyclic voltammogram of 2,6-lutidinium tetrafluoroborate (0.4 M, 0.2 M [NBu<sub>4</sub>][BF<sub>4</sub>] in acetonitrile, 0.1 V.s<sup>-1</sup>). 2

Figure S4. IR-SEC single beam spectra recorded during (top) reduction and (bottom) re-oxidation of **I-bzNO<sub>2</sub>** in CH<sub>2</sub>Cl<sub>2</sub> (2 mM, 0.2 M TBAPF<sub>6</sub>). For this, and subsequent, figures the initial spectrum of each block is shown in green and the final spectrum in blue. 3

Figure S5. IR-SEC spectra recorded during (a) the reduction and (b) re-oxidation of **I-bzNO<sub>2</sub>** in the presence of HLut<sup>+</sup>. 3

Table S1. EasySpin EPR simulation parameters for [**I-bzNO<sub>2</sub>**]<sup>-</sup>.

Table S2. Determination of the free energy activation (ΔG<sup>‡</sup>) parameter in CDCl<sub>3</sub>; T<sub>c</sub> is the coalescence temperature; Δv<sub>ab</sub> is determined from the slow limit spectra.

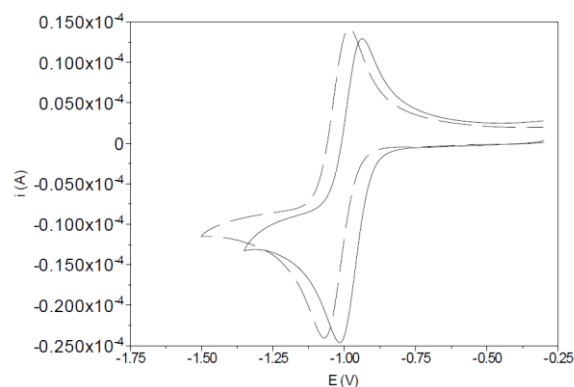

Figure S1 Cyclic voltammogram of (— —) nitrobenzene (2 mM) and (—)  $\text{CH}_3\text{C}(\text{CH}_2\text{S})_2\text{CH}_2\text{S}(\text{C}_6\text{H}_4\text{-p-NO}_2)$  (12) (2 mM) (0.2 M  $[\text{NBu}_4][\text{BF}_4]$  in acetonitrile,  $0.1 \text{ V}\cdot\text{s}^{-1}$ ).

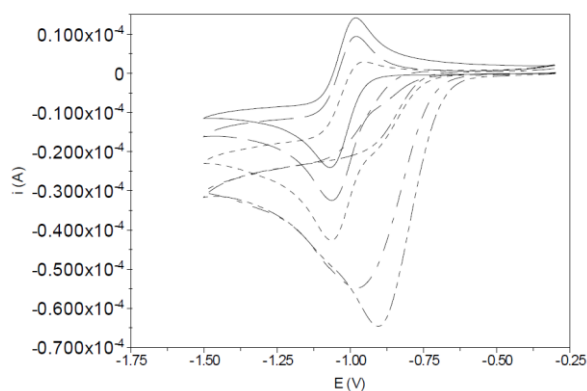

Figure S2. Cyclic voltammograms of the primary reduction processes of nitrobenzene (2 mM, 0.2 M  $[\text{NBu}_4][\text{BF}_4]$  in acetonitrile,  $0.1 \text{ V}\cdot\text{s}^{-1}$ ) in the absence and in the presence of acetic acid: 0 (—), 1 (— —), 5 (---), 15 (— · —) and 30 equivalents (— · · —).

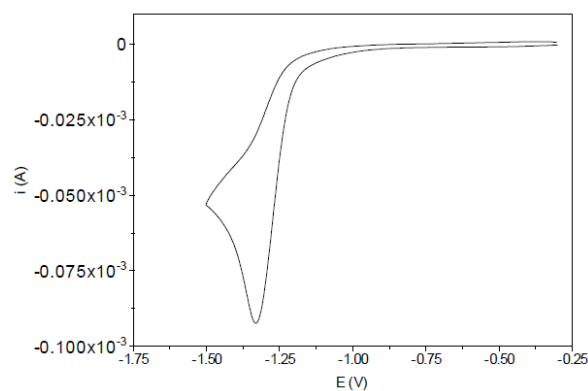

Figure S3. Cyclic voltammogram of 2,6-lutidinium tetrafluoroborate (0.4 M, 0.2 M  $[\text{NBu}_4][\text{BF}_4]$  in acetonitrile,  $0.1 \text{ V}\cdot\text{s}^{-1}$ ).

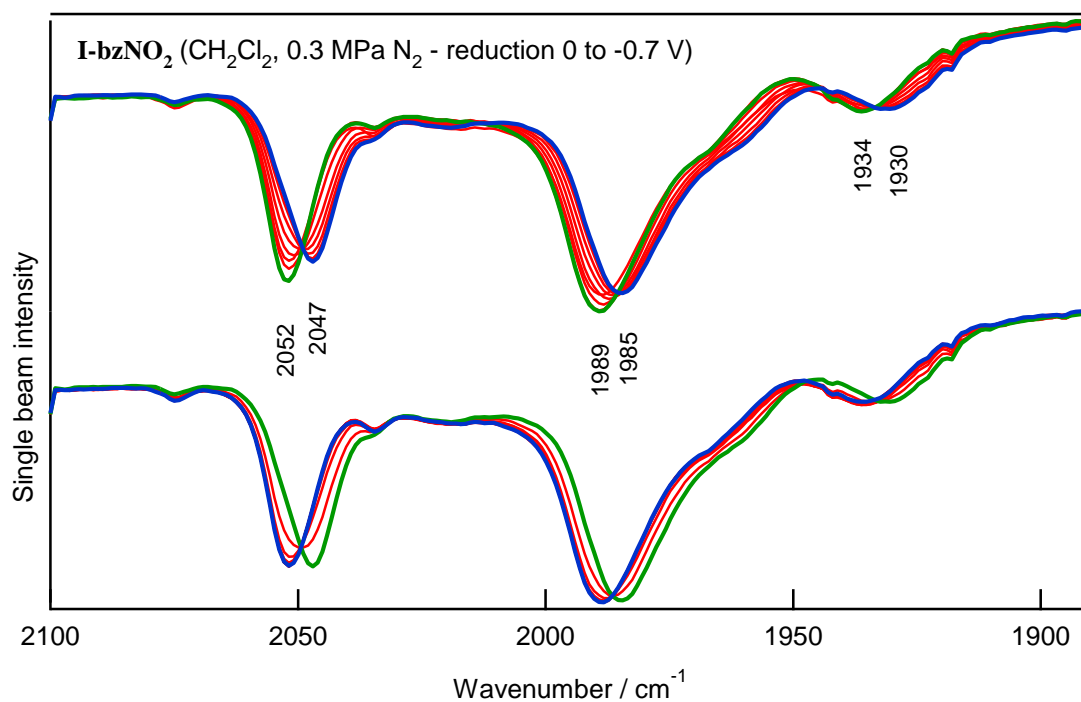

Figure S4. IR-SEC single beam spectra recorded during (top) reduction and (bottom) re-oxidation of **I-bzNO<sub>2</sub>** in  $\text{CH}_2\text{Cl}_2$  (2 mM, 0.2 M TBAPF<sub>6</sub>). For this, and subsequent, figures the initial spectrum of each block is shown in green and the final spectrum in blue.

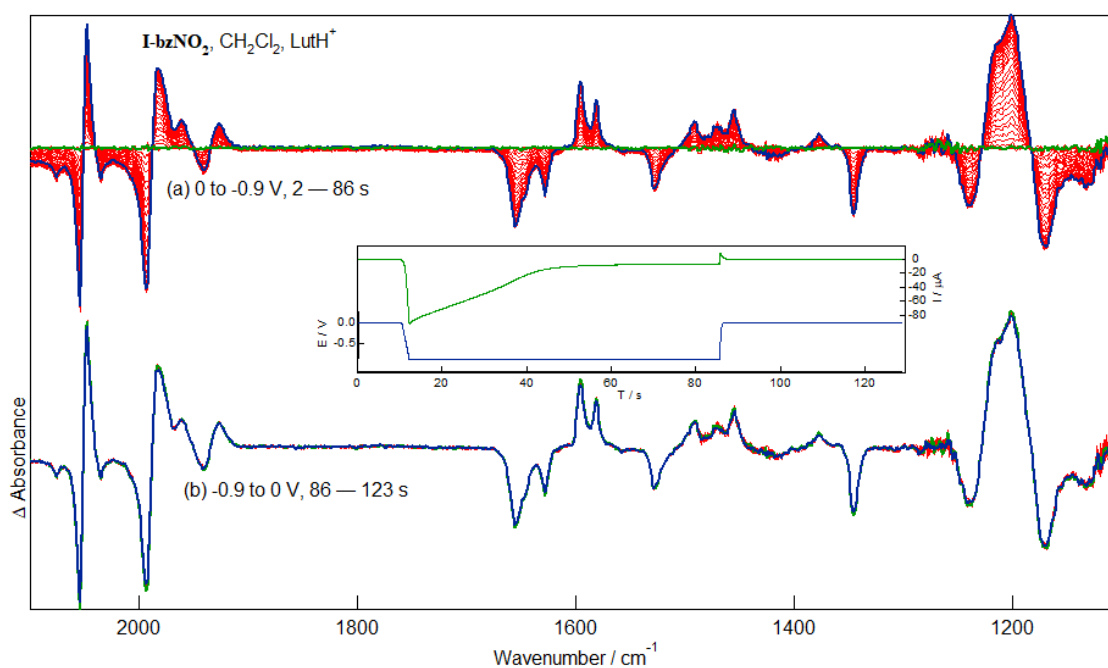

Figure S5. IR-SEC spectra recorded during (a) the reduction and (b) re-oxidation of **I-bzNO<sub>2</sub>** in the presence of  $\text{HLut}^+$ .

Table S1. EasySpin EPR simulation parameters for [I-bzNO<sub>2</sub>]<sup>•−</sup>.

```

[Bexp,Espc,Params] = eprload('sb_fe2s3no2_hires_1');
Bexp = Bexp/10;
Be = Bexp .';
Bt = Be(3688:6145);
Esp = Espc .';
Espt = Esp(3688:6145);
g = (71.44775 * Params.MF) ./ Be;
Exp.mwFreq = Params.MF;
Exp.Range = [min(Bt) max(Bt)];
Exp.nPoints = size(Bt,1);
Sys.g = 2.00543;
Sys.Nucs = 'N, H, H, H, H, H';
Sys.n = [1 1 1 1 1 2];
Sys.lwpp = [0.08 0.036]*0.65;
An = 24.43;
Ah1 = 10.3;
Ah1p = 8.4;
Ah2 = 3.6;
Ah2p = 2.4;
Sys.A = [An, Ah1, Ah1p, Ah2, Ah2p, 1.4];
[Bsim,Sspc] = garlic(Sys,Exp);
Sspc = 1.5 * Sspc;
subplot(1,1,1), plot(Bt,Espt, Bsim,Sspc);

```

Table S2. Determination of the free energy activation ( $\Delta G^\ddagger$ ) parameter in CDCl<sub>3</sub>;  $T_c$  is the coalescence temperature;  $\Delta v_{ab}$  is determined from the slow limit spectra.

| Compound                         | $\Delta v_{ab}$<br>(Hz) | $T_c$<br>(K) | $\Delta G^\ddagger$ (at $T_c$ )<br>(kJ.mol <sup>−1</sup> ) | $\Delta G^\ddagger$ (at $T_c$ )<br><i>simulated</i><br>(kJ.mol <sup>−1</sup> ) | $\Delta H^\ddagger$<br>(kJ.mol <sup>−1</sup> ) | $E_a$<br>(kJ.mol <sup>−1</sup> ) |
|----------------------------------|-------------------------|--------------|------------------------------------------------------------|--------------------------------------------------------------------------------|------------------------------------------------|----------------------------------|
| I-bzNO <sub>2</sub>              | 20-330*                 | 200          | /                                                          | 38-42                                                                          | /                                              | /                                |
| I-bzNH <sub>2</sub>              | 323                     | 243          | 45.8 ± 0.5                                                 | 45.80                                                                          | 51.7                                           | 55.4                             |
| I-bzNH <sub>3</sub> <sup>+</sup> | 315                     | 208          | 39.0 ± 0.5                                                 | 38.98                                                                          | 14.2                                           | 16.2                             |

\* Due to the machine limitation it was not possible to record the slow limit spectra, however coalescence at approximately 200 K was observed and a range of value for  $\Delta G^\ddagger$  was obtained by simulating the slow limit spectra using the programme gNMR.

NMR experiments were performed in *d*-chloroform and from the data activation energies  $\Delta G^\ddagger$  for the AB↔A2 spin system of different {2Fe3S}-complexes were calculated at  $T_c$  and these are given in Table S1. Simulations of the NMR spectra were also performed and  $\Delta G^\ddagger$  values (at  $T_c$ ) are in very good agreement with the experimental data. Simulation of the spectra over a range of temperatures provides further data.  $\Delta H^\ddagger$  are obtained from the Eyring plot (ln  $k/T$  vs.  $1/T$ ) and values of  $E_a$  are obtained from an Arrhenius plot (ln  $k$  vs.  $1/T$ ), noting that  $\Delta H^\ddagger \approx E_a - RT$ . In both cases,  $k$  values were estimated by simulation of the experimental spectra.
