# Supplementary material
Source: MDPI journal article supplement (https://www.mdpi.com/2304-6740/7/3/37)
Supplement: s1 [file s1]

Archive with 4 entries (3 files):
- Cif and checkcif files/
- Cif and checkcif files/cedric10.cif
- Cif and checkcif files/checkcif.pdf
- inorganics-447957-supplementary materials.pdf
